# Supplementary material for: Quantitative detection of crystal violet using a surface-enhanced Raman scattering based on a flower-like HAp/Ag nanocomposite
Source: Royal Society of Chemistry journal article supplement (doi:10.1039/d1ay01107c), 2021-01-01
Supplement: d1ay01107c1.pdf [file d1ay01107c1.pdf]

## Supplementary information

### Quantitative detection of crystal violet using a surface-enhanced Raman scattering based on flower-like HAp/Ag nanocomposite

Yamin Lin<sup>a,†</sup>, Mengmeng Zheng<sup>a,†</sup>, Xin Zhao<sup>a</sup>, Dan Liu<sup>a</sup>, Jiamin Gao<sup>a</sup>, Wei Gong<sup>a</sup>, Shusen Xie<sup>a</sup>, Siqi Gao<sup>a\*</sup>, Yun Yu<sup>c\*</sup>, Juqiang Lin<sup>a,b\*</sup>

<sup>a</sup>MOE Key Laboratory of OptoElectronic Science and Technology for Medicine and Fujian Provincial Key Laboratory for Photonics Technology, Fujian Normal University, Fuzhou, Fujian, China

<sup>b</sup>School of opto-electronic and Communication Engineering, Xiamen University of Technology, Xiamen, Fujian, China

<sup>c</sup>College of Integrated Traditional Chinese and Western Medicine, Fujian University of Traditional Chinese Medicine, Fuzhou, Fujian, China

<sup>†</sup>These authors contributed equally to the work.

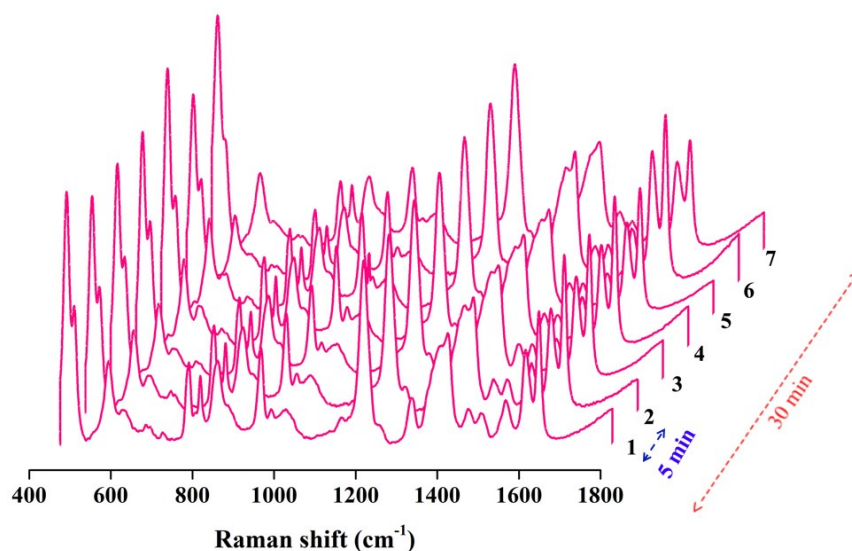

**Fig. 1.** Time-resolved SERS spectra recorded at 5 min intervals on the same CV sample using HAp/Ag substrate. Each spectrum was obtained under the condition of 785 nm wavelength, 10 s exposure time and 2 mW incident laser power.

Table S1. Comparison of the HAp/Ag nanocomposite-based SERS with other methods for detection CV.

| Methods                           | High sensitivity | Low cost | Fast detection | References |
|-----------------------------------|------------------|----------|----------------|------------|
| (AuNPs/P2VP) composite microgels  | √                | ×        | ×              | 1          |
| ZnO@Au nanorods                   | √                | ×        | ×              | 2          |
| Micro-cloud point extraction      | √                | ×        | √              | 3          |
| Our method (HAp/Ag nanocomposite) | √                | √        | √              |            |

## References

- 1 H. Chen, T. You, L. Jiang, Y. Gao and P. Yin, *RSC Adv.*, 2017, **7**, 32743-32748.
- 2 L. Xu, H. Zhang, Y. Tian, A. Jiao, F. Chen and M. Chen, *Talanta*, 2019, **194**, 680-688.
- 3 E. Ghasemi and M. Kaykhaii, *Spectrochim. Acta. A.*, 2016, **164**, 93-97.
